# Supplementary material
Source: PubMed Central journal article supplement (PMC9127773)
Supplement: NEJMoa2201300_appendix.pdf [file NEJMoa2201300_appendix.pdf]

## Supplementary Appendix

Supplement to: Hager KJ, Pérez Marc G, Gobeil P, et al. Efficacy and safety of a recombinant plant-based adjuvanted Covid-19 vaccine. *N Engl J Med*. DOI: 10.1056/NEJMoa2201300

This appendix has been provided by the authors to give readers additional information about the work.

# Efficacy and Safety of a Recombinant Plant-Based, Adjuvanted COVID-19 Vaccine

## SUPPLEMENTARY APPENDIX

### Table of Contents

|                                                                                                                                                                                     |           |
|-------------------------------------------------------------------------------------------------------------------------------------------------------------------------------------|-----------|
| List of Investigators.....                                                                                                                                                          | 2         |
| Supplementary Methods.....                                                                                                                                                          | 6         |
| <b>Supplementary Figure S1   Circulating Variants During Course of Clinical Trial .....</b>                                                                                         | <b>13</b> |
| <b>Supplementary Table S1   Primary, Secondary and Exploratory Objectives of the Study.....</b>                                                                                     | <b>15</b> |
| <b>Supplementary Table S2   Summary of Demographics in the Intention to Treat (ITT) Set.....</b>                                                                                    | <b>17</b> |
| <b>Supplementary Table S3   Summary of Demographics in the Per Protocol set .....</b>                                                                                               | <b>18</b> |
| <b>Supplementary Table S4   Baseline Comorbidities .....</b>                                                                                                                        | <b>19</b> |
| <b>Supplementary Table S5   Representativeness of Study Participants .....</b>                                                                                                      | <b>20</b> |
| <b>Supplementary Table S6   Demographics According to Study Discontinuation .....</b>                                                                                               | <b>21</b> |
| <b>Supplementary Table S7   Efficacy by Subgroup (Per Protocol Set) .....</b>                                                                                                       | <b>22</b> |
| <b>Supplementary Table S8   Redistribution of Sequencing Failures among Variants.....</b>                                                                                           | <b>23</b> |
| <b>Supplementary Table S9   Incidence of Solicited Local Adverse Events (SAS) .....</b>                                                                                             | <b>24</b> |
| <b>Supplementary Table S10   Incidence of Solicited Systemic Adverse Events (SAS).....</b>                                                                                          | <b>25</b> |
| <b>Supplementary Table S11   Overall Summary of Unsolicited Adverse Events up to Twenty-One Days after Each Vaccine (SAS) .....</b>                                                 | <b>27</b> |
| <b>Supplementary Table S12   Overall Summary of Unsolicited Adverse Events from Day 43 to 201 (SAS).....</b>                                                                        | <b>28</b> |
| <b>Supplementary Table S13   Incidence of Specific Unsolicited Adverse Events reported up to the Safety Data cut-off date of October 25, 2021 (SAS) .....</b>                       | <b>29</b> |
| <b>Supplementary Table S14   Incidence of Adverse Events of Special Interest based on Serious Adverse Events Reported after Vaccination with Other COVID-19 Vaccines (SAS).....</b> | <b>30</b> |
| <b>References .....</b>                                                                                                                                                             | <b>31</b> |

*List of Investigators*

| Country   | Investigator                 | Institution                                                                             |
|-----------|------------------------------|-----------------------------------------------------------------------------------------|
| Argentina | Chirino Navarta, Daniel      | Mautalen Salud e Investigación (Expertia SA), Buenos Aires                              |
| Argentina | Llapur, Conrado              | Clinica Mayo de UMCB SRL, San Miguel de Tucumán                                         |
| Argentina | Maulen, Sergio               | Fundación FunDaMos, Buenos Aires                                                        |
| Argentina | Perez Marc, Gonzalo          | Hospital Militar Central Cirujano Mayor Dr. Cosme Argerich, Buenos Aires                |
| Argentina | Polack, Fernando             | Hospital Militar Central Cirujano Mayor Dr. Cosme Argerich, Buenos Aires                |
| Argentina | Riera, Fernando              | Sanatorio Allende, Cordoba                                                              |
| Brazil    | Diaz, Ricardo                | Azidus Brasil Pesquisa e Desenvolvimento Ltda, Valinhos, Sao Paulo                      |
| Brazil    | Ferrara, Luciana             | Azidus Brasil Pesquisa e Desenvolvimento Ltda, Valinhos, Sao Paulo                      |
| Brazil    | Freire, Antonio              | Santa Casa De Misericordia De Belo Horizonte, Belo Horizonte, Minas Gerais              |
| Brazil    | Hammes, Luciano              | Centro de Pesquisa Clinica - Hospital Moinhos de Vento, Porto Alegre, Rio Grande do Sul |
| Brazil    | Itinose, Kengi               | Unidade Hospital do Rocio, Campo Largo                                                  |
| Brazil    | Nogueira, Mauricio           | Fundação Faculdade Regional de Medicina de Sao Jose do Rio Preto, Sao Jose do Rio Preto |
| Brazil    | Vasconcellos, Eduardo Freire | Instituto de Pesquisas Clinicas L2IP, Brasilia, DF                                      |
| Brazil    | Wolff, Priscila Geller       | IBPClin Instituto Brasil de Pesquisa Clinica, Rio de Janeiro                            |
| Canada    | Abitbol, Alexander           | LMC Clinical Research Inc. (CPU), Toronto, Ontario                                      |
| Canada    | Aggarwal, Naresh             | Aggarwal and Associates Ltd, Brampton, Ontario                                          |
| Canada    | Badenhorst, Josias           | CARe Clinic, Red Deer, Alberta                                                          |
| Canada    | Dionne, Marc                 | CHU de Québec-Université Laval, Quebec City, Quebec                                     |
| Canada    | Frechette, Andre             | Diex Research Quebec Inc, Quebec City, Quebec                                           |
| Canada    | Gauthier, Jean Sebastien     | QT Research Sherbrooke, Sherbrooke, Quebec                                              |
| Canada    | Girard, Ginette              | Diex Research, Sherbrooke, Quebec                                                       |
| Canada    | Henein, Sam                  | SKDS Research Inc., Newmarket, Ontario                                                  |
| Canada    | Libman, Michael              | McGill University Health Centre Vaccine Study Centre, Pierrefonds, Quebec               |

| Country        | Investigator                  | Institution                                                                                                                        |
|----------------|-------------------------------|------------------------------------------------------------------------------------------------------------------------------------|
| Canada         | Paquette, Jean-Sebastien      | Diex Recherche Joliette, Saint-Charles-Borromée, Quebec                                                                            |
| Canada         | Tellier, Guy                  | Manna Research Mirabel, Mirabel, Quebec                                                                                            |
| Canada         | Vale, Noah                    | Manna Research Toronto, Toronto, Ontario                                                                                           |
| Canada         | Vallieres, Gerald             | Manna Research Quebec, Lévis, Quebec                                                                                               |
| Canada         | Wallace, Garry                | Dawson Clinical Research Inc., Guelph, Ontario                                                                                     |
| Mexico         | Castro Melchor, Liliana       | Investigación Biomédica para el Desarrollo de Fármacos, S.A. de C.V., Zapopan                                                      |
| Mexico         | De los Rios Ibarra, Manuel    | Centro para el Desarrollo de la Medicina y de Asistencia Médica Especializada SC, Culiacan                                         |
| Mexico         | Del Carpio, Luis              | Sociedad de Metabolismo y Corazon S.C (SOMECO), Veracruz                                                                           |
| Mexico         | Guzman Romero, Ana Karla      | RM Pharma Specialists S.A. de C.V., Ciudad de Mexico                                                                               |
| Mexico         | Martínez Perez, Jose Miguel   | Integra RGH Centro de Investigacion - Clinica de Ozonoterapia RGH AC, Puebla                                                       |
| Mexico         | Rios Mejia, Edmundo Daniel    | Investigación Biomédica para el Desarrollo de Fármacos, S.A. de C.V., Aguascalientes                                               |
| Mexico         | Sanchez Campos, Efren Alberto | Centro Multidisciplinario para el Desarrollo Especializado de la Investigación Clínica en Yucatan S.C.P. (CEMDEICY S.C.P.), Merida |
| United Kingdom | Apoola, Ade                   | University Hospitals Derby and Burton, Derby                                                                                       |
| United Kingdom | Galloway, James               | Kings College Hospital, London                                                                                                     |
| United Kingdom | Healy, Brendan                | Public Health Wales NHS Trust, Cardiff                                                                                             |
| United Kingdom | Kyriakidou, Christina         | Synexus Midlands Clinical Research Centre, Birmingham                                                                              |
| United Kingdom | Lacey, Charles                | University of York/York Teaching Hospital, York                                                                                    |
| United Kingdom | Moore, Patrick                | University Hospitals Dorset NHS Foundation Trust, Bournemouth                                                                      |
| United Kingdom | Nicholls, Helen               | Synexus Wales Clinical Research Centre DRS, Cardiff                                                                                |
| United Kingdom | Prestwell, Carol              | Synexus Lancashire Clinical Research Centre DRS, Chorley                                                                           |
| United Kingdom | Soiza, Roy                    | NHS Grampian, Aberdeen                                                                                                             |
| United Kingdom | Viljoen, Marlies              | Synexus Manchester Clinical Research Centre DRS, Manchester                                                                        |
| United Kingdom | Whittington, Ashley           | London North West University Healthcare NHS Trust, Harrow                                                                          |

| Country       | Investigator       | Institution                                                            |
|---------------|--------------------|------------------------------------------------------------------------|
| United States | Aazami, Hessam     | Hope Clinical, Canoga Park, California                                 |
| United States | Adelglass, Jeffrey | Research Your Health, Plano, Texas                                     |
| United States | Anderson, Duane    | Excel Clinical Research, Las Vegas, Nevada                             |
| United States | Arora, Samir       | Aventiv Research Inc, Columbus, Ohio                                   |
| United States | Berger, Ira        | Meridian Clinical Research, Rockville, Maryland                        |
| United States | Bordon, Jose       | Ascension Providence Health System, Washington, DC                     |
| United States | Bradley, Paul      | Meridian Clinical Research, Savannah, Georgia                          |
| United States | Carlson, Mark      | Be Well Clinical Studies, LLC, Lincoln, Nebraska                       |
| United States | Casey, Sherri      | Benchmark Research, Covington, Louisiana                               |
| United States | Chu, Laurence      | Benchmark Research, Austin, Texas                                      |
| United States | DeFrancisco, Don   | Pharmacology Research Institute, Newport Beach, California             |
| United States | Ebuh, Valentine    | Global Medical Research, Dallas, Texas                                 |
| United States | Ensz, David        | Meridian Clinical Research, Sioux City, Iowa                           |
| United States | Essink, Brandon    | Meridian Clinical Research LLC, Omaha, Nebraska                        |
| United States | Fiel, Thomas       | Fiel Family & Sports Medicine/ CCT Research, Tempe, Arizona            |
| United States | Forte, Dana        | Forte Family Practice/ CCT Research, Las Vegas, Nevada                 |
| United States | Fussell, Suzanne   | Long Beach Clinical Trial Services Inc, Long Beach, California         |
| United States | Gregerson, Gary    | ASR, LLC, Nampa, Idaho                                                 |
| United States | Haffizulla, Jason  | Precision Clinical Research, LLC, Sunrise, Florida                     |
| United States | Hassman, Michael   | Hassman Research Institute, Berlin, New Jersey                         |
| United States | Hemmersmeier, John | South Ogden Family Medicine/ CCT Research, Ogden, Utah                 |
| United States | Hong, Mathew       | M3 Wake Research, Inc, Raleigh, North Carolina                         |
| United States | Juvvadi, Nikhila   | Affinity Health, Chicago, Illinois                                     |
| United States | Latorre, Agustin   | AppleMed Research Inc, Miami, Florida                                  |
| United States | Martin, Earl       | DM Clinical Research/Martin Diagnostic Clinic, Tomball, Texas          |
| United States | Oppong, Yaa        | Carolina Institute for Clinical Research, Fayetteville, North Carolina |
| United States | Patel, Suchet      | Meridian Clinical Research, LLC, Endwell, New York                     |
| United States | Pickrell, Paul     | Tekton Research, Austin, Texas                                         |

| Country       | Investigator     | Institution                                                                                                       |
|---------------|------------------|-------------------------------------------------------------------------------------------------------------------|
| United States | Rosen, Jeffrey   | AMR Miami, formerly Clinical Research of South Florida, Coral Gables, Florida                                     |
| United States | Rothenberg, Joan | Velocity Clinical Research, Cleveland, Ohio                                                                       |
| United States | Schwartz, Howard | Research Centers of America, Hollywood, Florida                                                                   |
| United States | Seger, William   | Benchmark Research, Fort Worth, Texas                                                                             |
| United States | Tarakjian, Denis | WR-MCCR, LLC, San Diego, California                                                                               |
| United States | Thakkar, Harish  | Mt. Olympus Medical Research LLC, Sugarland, Texas                                                                |
| United States | Vanderzyl, John  | Sugar Lakes Family Practice, PA - an Elligo Health Research Site, Sugarland, Texas                                |
| United States | Vrbicky, Keith   | Meridian Clinical Research LLC, Norfolk, Nebraska                                                                 |
| United States | Walters, Alton   | Las Vegas Clinical Trials, North Las Vegas, Nevada                                                                |
| United States | Williams, Barton | Trial Management Associates, LLC, Wilmington, North Carolina                                                      |
| United States | Williams, Hayes  | Achieve Clinical Research, LLC dba Accel Research Sites at Birmingham Clinical Research Unit, Birmingham, Alabama |
| United States | Wolf, Thomas     | Methodist Physicians Clinic / CCT Research, Fremont, Nebraska                                                     |
| United States | Zeig, Steven     | Elixia LLC, Palm Beach, Florida                                                                                   |

## *Supplementary Methods*

### ***Context in which the study was performed***

The current trial was conducted during active roll-out of emergency-use or approved SARS-CoV-2 vaccines. Although the pace and penetration of these campaigns varied, recruitment of elderly participants and those with comorbidities became progressively more difficult over time, leading to smaller numbers in these populations than originally planned. Furthermore, as vaccine eligibility expanded, a growing number of participants exercised their Protocol-sanctioned option to withdraw or be unblinded to consider accessing another vaccine. This led to progressive loss of participants with a growing imbalance between the CoVLP+AS03 and placebo groups that was managed by using person-year denominators to calculate all efficacy outcomes i.e.: the accrued follow-up time for each participant was considered. Overall, 2712 participants in the placebo group (22.5%) and 600 participants in the CoVLP+AS03 group (5.0%) were unblinded prior to Interim Order/Emergency Use Authorization (IO/EUA) per pre-specified criteria and discontinued prematurely to receive a deployed vaccine. The number of participants who left the study by country for the placebo and CoVLP+AS03 groups were: 744 (15.0%) and 160 (3.2%) in Argentina, 1441 (34.2%) and 150 (3.6%) in Brazil, 417 (61.5%) and 233 (34.5%) in Canada, 53 (37.3%) and 18 (11.9%) in the United Kingdom, 0 (0%) and 0 (0%) in Mexico, and 57 (4.3%) and 39 (2.9%) in the USA. In order to identify cases rapidly during vaccine roll-out, a single symptom COVID-19-compatible was used to trigger PCR testing, likely resulting in the detection of minimally-symptomatic cases. Finally, CoVLP+AS03 was challenged by multiple variants with increased transmissibility, resistance to vaccine-induced immunity or both (Figure S1).

### ***Trial Oversight***

The trial is being conducted in accordance with current International Conference on Harmonization (ICH) guidelines on Good Clinical Practice, and applicable country-specific regulatory requirements. All participants provided written informed consent before being enrolled. Appropriate Independent Institutional Review Boards and/or Ethics Committees approved the protocol, protocol amendments and consent forms. Safety and efficacy data were reviewed by an Independent Data Monitoring Committee (IDMC) as needed.

The trial is ongoing, and, at the time of writing, the investigators remained unaware of participant-level treatment assignments. Limited team members have unblinded access to the

data to facilitate submission of clinical safety findings to regulatory agencies and the IDMC. All other trial staff and participants remain unaware of treatment assignments.

The study was designed by Medicago R&D Inc with input from GSK and conducted with the assistance of Syneos Health Canada, including study management, monitoring, medical monitoring, data collection, IDMC and IDMC sub-committee management, and analysis. Site investigators were responsible for subject recruitment, local study conduct and data collection. Key laboratory outcomes were generated by ViroClinics/DDL (Rotterdam, NL: RT-PCR, sequencing and strain assignment). Ultimate responsibility for the integrity and analysis of the data, the writing and review of the manuscript and the decision to submit for publication rests with Medicago R & D Inc with input from GSK. The contributions of individual authors to these activities are provided under *Author Contributions* at the end of the main text.

### ***Safety Oversight***

The median duration of time to censoring for the analysis of local and systemic solicited adverse events (ITT) was 3.7 months (25<sup>th</sup>:75<sup>th</sup> percentiles 2.9:4.2 months and 3.0 months (25<sup>th</sup>:75<sup>th</sup> percentiles 2.0:3.9) months for the CoVLP+AS03 and placebo arms respectively. Safety oversight was provided by the Safety Monitoring Team that reviewed safety data on a regular basis in a blinded manner. This included data on Adverse Events of Special Interest (AESIs) including potential Immune-Mediated Diseases (pIMDs), Medically-Attended Adverse Events (MAAE), Serious Adverse Events (SAE) including anaphylaxis and severe allergic reactions, Vaccine-Associated Enhanced Disease (VAED), or Vaccine-Associated Enhanced Respiratory Disease (VAERD), with triggers in place to escalate to the IDMC if a potential safety signal was identified. In parallel, an unblinded medical monitor reviewed unblinded data on a real-time basis to escalate to the IDMC if a stopping rule was met. The safety and efficacy data were also reviewed by the IDMC, to confirm that the primary vaccine efficacy endpoint had been met, and that the benefit/risk profile was positive.

### ***Trial Vaccine***

CoVLP is composed of full-length S glycoprotein from SARS-CoV-2 (strain hCoV-19/USA/CA2/2020) in a pre-fusion stabilized conformation with R667G, R668S, R670S, K971P and V972P modifications, expressed in *Nicotiana benthamiana* by *Agrobacterium-*



based transient transfection. Expression results in formation of S trimers followed by spontaneous budding of 100-150 nm virus-like particles from the plasma membranes of leaf cells. AS03 is an oil-in-water emulsion containing DL- $\alpha$ -tocopherol and squalene (GlaxoSmithKline, Wavre, Belgium). The placebo was composed of 0.5 mL phosphate-buffered saline (PBS) with polysorbate 80.

### ***Preparation of the Vaccine***

Immediately prior to use, 2.5 mL of CoVLP and 2.5 mL of AS03 were mixed in a multidose vial to obtain 10 vaccine doses of 0.5 mL each. Each dose of the vaccine contained 3.75  $\mu$ g of CoVLP formulated in PBS with polysorbate 80, 11.86 mg of DL- $\alpha$ -tocopherol and 10.69 mg of squalene. Once mixed, the combined CoVLP+AS03 was stored at room temperature protected from light and had to be used within 6 hours.

### ***Calculation of Vaccine Efficacy***

Symptoms that could trigger SARS-CoV-2 testing included fever or chills, cough, shortness of breath or difficulty breathing, fatigue, muscle or body aches, headache, loss of taste or smell, sore throat, congestion or runny nose, nausea or vomiting or diarrhea. Vaccine Efficacy (VE) was calculated as  $100 \times (1 - \text{incidence rate ratio (IRR)})$  where the IRR is defined as the ratio of person-years rate of COVID-19 cases in the CoVLP+AS03 group relative to cases in the placebo group. For both the Intention-To-Treat (ITT) and Per-Protocol analysis sets, censoring was performed at the earliest of any of the following events: occurrence of virologically-confirmed COVID-19 (date of first symptoms), the database was frozen for the Primary Vaccine Efficacy (PVE) analysis, the date a subject was unblinded, the date a subject received another COVID-19 vaccine, or the date a subject withdrew from the study. The VE success criteria for the PVE endpoint were defined as a  $\geq 50$  %-point estimate and a  $>30$  % lower limit of the 95% CI. Assuming the number of cases in each arm followed a Poisson distribution, then conditioning on the total number of cases and the ratio of person-time of follow up, the exact 95% CIs for the IRR, and hence for  $VE = 1 - IRR$ , was obtained assuming a binomial distribution with mid-P adjustment<sup>1</sup>. VE for secondary endpoints was analyzed using the same methods, except for the success criterion being defined as  $>0$ % lower limit of the 95% CI. The widths of confidence intervals for secondary and subgroup analyses have not been adjusted for multiplicity, and hence are best regarded as descriptive.

Cumulative incidence curves were calculated using the Kaplan-Meier method. All data presented in this manuscript are the result of pre-specified outcomes except for VE versus moderate-to-severe disease and the sub-analysis of viral load at diagnosis. Although measurement of viral load post-infection was a pre-specified endpoint, the analysis by subgroup presented herein was not anticipated and should therefore be considered *post hoc*. While analysis of VE against severe disease was anticipated (secondary outcome), the analysis of VE versus moderate-to-severe disease was *post hoc*, driven in large part by the small number of severe cases observed in the study.

For this endpoint-driven vaccine efficacy study, assuming a true vaccine efficacy of 60%, a 1:1 treatment randomization ratio, and expecting the lower limit of the 95% confidence interval of vaccine efficacy of at least 30%, and vaccine efficacy of at least 50%, a sample size of 30,000 subjects with a minimum of 160 COVID-19 cases was estimated to provide at least 90% power.

#### ***Protocol for PCR-Testing and Viral Load Analysis***

At the current time, viral load (VL) data are available only for the initial (i.e.: diagnostic) nasopharyngeal swab. In this study, PCR testing was triggered by the persistence of  $\geq 1$  COVID-19-compatible symptom lasting  $>24$  hours and every attempt was made to obtain this swab as quickly as possible. Because of the anticipated delays in shipping to the central PCR-testing facility in the Netherlands, initial testing included a local test (i.e.: PCR or antigen-capture) as well as swabs for the central laboratory. If the local test was positive, participants were given a kit with enough swabs for every other day self-testing for up to 14 days to permit assessment of VL over time (i.e.: intensity and duration of viral shedding). The analysis of these swabs is under way and will be reported separately. Only the PCR testing performed by the central laboratory was used for defining the primary vaccine efficacy analysis set and for the VL calculations presented herein. The VL was determined using PCR targeting the nucleocapsid gene. Primers and assay conditions were based on the CDC N1 assay<sup>2</sup>. The resulting cycle threshold (Ct) values were plotted against a four-point standard curve run simultaneously with test samples and converted to  $\log_{10}$  copies/mL (cp/mL). Viral load values under the detection limit (2.08  $\log_{10}$ ) were set to half of that limit.

#### ***Rationale for Viral Load Analysis***

Analysis of viral load was a pre-specified secondary outcome of the study to assess both the intensity and duration of viral shedding in CoVLP+AS03 versus Placebo recipients. To achieve this outcome, swabs collected every other day for up to 14 days after an initial positive PCR were to be used to assess the viral burden from diagnosis until clearance (i.e.: area under the curve). The analysis of viral load at diagnosis and comparison between groups and sub-groups presented in this work was prompted by the unexpected observation of a 2-fold difference between sequencing success between breakthrough cases in the CoVLP+AS03 arm of the study and placebo cases. As a result, the VL data presented here represent only a part of a secondary outcome and their more detailed analysis goes beyond what was anticipated in the Statistical Analysis Plan (Appendix: SAP). As a result, these analyses should be considered, at least partially, *post hoc*.

### ***Viral Sequencing***

Sequencing of viral genomes from swabs was performed by Viroclinics-DDL (Netherlands). Total nucleic acid (DNA/RNA) isolation was performed with the MagMAX™ Viral/Pathogen Nucleic Acid Isolation kit on the KingFisher™ Flex instrument (ThermoFisher) using 400 µL sample input. Nucleic acid elution was performed in 50 µL of elution buffer. Full-length amplification of the target RNA, i.e., RNA encoding SARS-CoV-2 spike (S) protein, was performed by amplifying 5 overlapping fragments of ~900 bp by nested RT-PCR using the primer sets from the CDC Singleplex PCR 38 amplicons protocol (PacBio). The outer one-step RT-PCR was performed with the outer S-gene primer sets and the SuperScript™ III One-Step RT-PCR System with Platinum™ Taq High Fidelity DNA Polymerase (ThermoFisher) using 5 µL of the isolated RNA. The nested (inner) amplification step was performed with the inner primer sets and the Phusion Hot Start II High-Fidelity DNA Polymerase (ThermoFisher) or Q5® Hot Start High-Fidelity DNA Polymerase (NEB). Nested PCR products were analyzed by gel electrophoresis using standard molecular biology protocols, to confirm successful amplification.

Next-generation sequence (NGS) analysis of S-gene amplicons was performed using the MiSeq or NextSeq Illumina platforms. NGS analysis was performed on samples consisting of two pools of non-overlapping S-gene amplicons. To generate single datasets for reporting and interpretation, the FASTQ files of the two pools of non-overlapping fragments were pooled together *in silico*. After combining the two datasets, all data was mapped against the same

reference sequence (SARS-CoV-2 Wuhan-Hu-1 GenBank: MN908947.3). Identifying the location on the reference genome allowed identification of reads that started or ended in or near a primer region (possibly containing primer ambiguity) in order to select them for the primer trimming algorithm. Sufficient nucleotides were trimmed off each read that was selected by this process and the remaining part of the read was considered non-primer derived. For *in silico* pooling and primer trimming, all primer locations were implemented in DDL's bioinformatics ATHENA pipeline. The deep sequencing process comprised: quantification of S-gene amplicon pools by PicoGreen or Qubit™; fragment dilutions and equimolar mixing to normalize the concentrations of each of the amplicon pools; library preparation with the Nextera XT System (Illumina); sequence reactions with 300-cycle kit (150 bp bidirectional reads) on the Illumina Miseq or with a 300-cycle mid output kit on the Illumina Nextseq; Data QC and Data reporting.

### ***Statistical Considerations***

As noted above, all efficacy calculations reported herein used 'person-years' as the denominator to adjust for an anticipated asymmetrical loss of placebo recipients compared to CoVLP+AS03 recipients through withdrawal and Protocol-sanctioned unblinding to access a deployed vaccine. At the time the study was performed, vaccines were available for older individuals and for people with high-risk comorbidities in most countries - explaining the smaller than expected number of these individuals in the study. As deployed vaccines became available for healthy, younger adults, many of those enrolled requested unblinding or simply withdrew from the study, presumably to access a vaccine although these data are not available for most subjects who left the study. It is logical that more of those who discovered they had received placebo left the study, leading to the imbalance between the Per Protocol group numbers over time. We have little personal/professional information for study participants so cannot assess either their likelihood of exposure (e.g.: living situation, front-line or healthcare worker) or their level of risk behaviour or risk tolerance (e.g.: likelihood of high-risk behaviours, gamesmanship related to study participation). Although such asymmetric loss of subjects from one study arm has the potential to introduce bias, data contributing to VE estimates were censored for all subjects at the time of unblinding even if they chose not to receive a deployed vaccine and to remain in the study.

An analysis of the participants who chose to unblind/withdraw and those who chose to remain in the study was conducted and no major differences were identified either within or between

groups in terms of age, sex, race/ethnicity, or geography (Table S6). The median period of time to censoring for the vaccine efficacy analysis was fairly even between both treatment groups: 1.5 months in the CoVLP recipients (25<sup>th</sup> and 75<sup>th</sup> percentiles: 0.8 and 2.0 months) and 1.4 months in the placebo recipients (25<sup>th</sup> and 75<sup>th</sup> percentiles: 0.8 and 1.9 months) in the ITT set. The corresponding values for the medians and 25<sup>th</sup>:75<sup>th</sup> percentiles for the per protocol set were 1.5 and 0.9:2.0 months for the CoVLP+AS03 group and 1.5 and 0.9:1.9 months for the placebo group.

The variant-specific efficacy analyses reported in this work are somewhat optimistic, in that the samples which could not be sequenced had, as a group, lower associated efficacy than those for which sequencing was successful. We therefore conducted a sensitivity analysis consisting of a ‘hot deck’ imputation incorporating calendar time, participant country of residence, and trial arm. In the first step, the sequenced data were put into cells formed by a cross tabulation of the quintiles of calendar time of sample collection and country. Then for each cell, the proportional distribution across variants was used to allocate the non-sequenced samples in each cell (resulting mainly in fractional cases). In the next step, the statistician doing the calculations unblinded the CoVLP:Placebo distribution in each cell, to further split each cell’s imputed contents in two. Finally, the imputed case contributions for each variant in each arm were summed over its 20 time-country cells, added to the corresponding totals of the known sequences, and then used to calculate efficacy by variant (Table S8).

***Supplementary Figure S1 | Circulating Variants During Course of Clinical Trial***

Each panel illustrates the variants circulating in time relative to the accrual of symptomatic COVID-19 cases for each nation in which the trial took place. Individual vertical columns indicate the incidence rate of variants reported to GISAID during a seven-day period relative to the total number of sequences reported for the period. Individual colors within the stacked columns represent variants in circulation as a percentage of total, shown on the left Y axis. In cases where sequence identity was not reported or does not refer to a Variant of Concern (VoC) or Variant of Interest (VoI), the incidence was reported as undefined. Red lines indicate the number of total adjudicated COVID-19 cases contributing to the calculation of primary vaccine efficacy accrued in each nation over time as a proportion of the total 165 cases (ITT set: right Y-axis). No COVID-19 cases accrued in Mexico. Dotted vertical lines indicate the date of first injection of a participant by country. FPI: First Patient In.

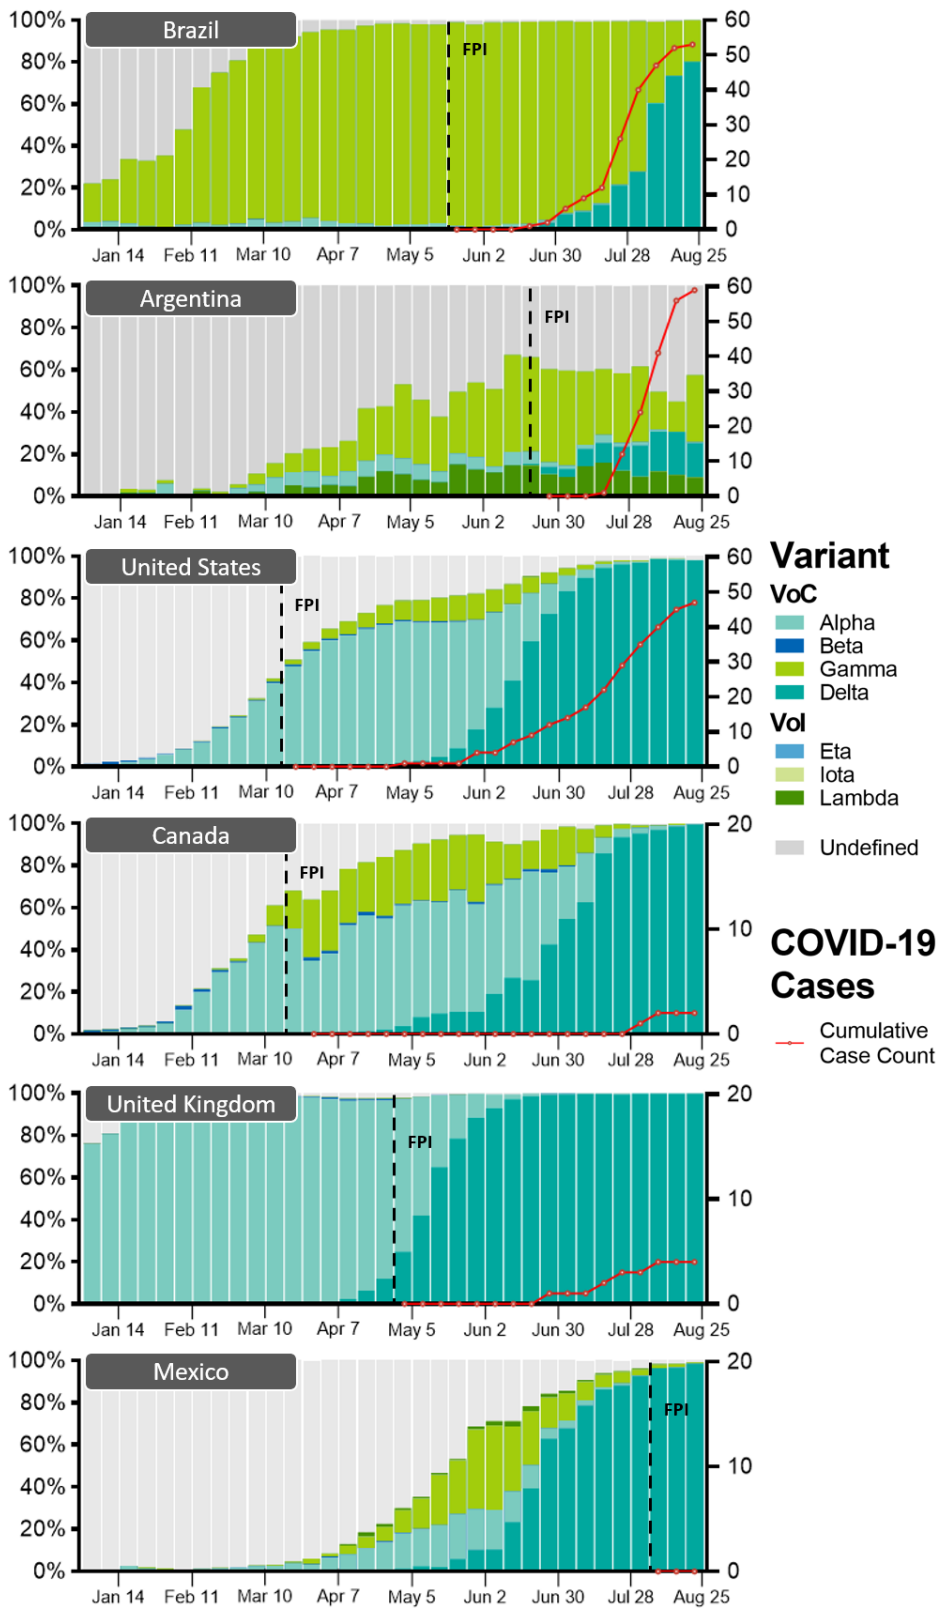

**Supplementary Table S1 | Primary, Secondary and Exploratory Objectives of the Study**

At the time of writing, the Phase 3 portion of this study is on-going and the data for several of the secondary and exploratory outcomes are not yet available for analysis. The results presented in this work represent efficacy and safety data up to the cut-off points of August 20<sup>th</sup> and October 25<sup>th</sup>, 2021 respectively and are indicated in italics in the Table below. Analyses of later time-points and other outcomes will be reported separately.

|                    |                                                                                                                                                                                                                                                                                                                                                                                                                                                                                                                                                                                                                                                                                                                                                                                                                                                                                                                                                                                                                                                                                                                              |
|--------------------|------------------------------------------------------------------------------------------------------------------------------------------------------------------------------------------------------------------------------------------------------------------------------------------------------------------------------------------------------------------------------------------------------------------------------------------------------------------------------------------------------------------------------------------------------------------------------------------------------------------------------------------------------------------------------------------------------------------------------------------------------------------------------------------------------------------------------------------------------------------------------------------------------------------------------------------------------------------------------------------------------------------------------------------------------------------------------------------------------------------------------|
| Primary Outcome    | <ul style="list-style-type: none"> <li>• <i>Evaluation of the efficacy of CoVLP+AS03 compared to placebo, to prevent PCR-confirmed symptomatic COVID-19 starting 7 days after the 2<sup>nd</sup> dose at the time of the primary vaccine efficacy (PVE) analysis. The criteria for triggering the PVE analysis were identification of <math>\geq 160</math> COVID-19 cases with a median safety follow-up of <math>\geq 2</math> months post-administration of the 2<sup>nd</sup> dose of <math>\geq 3000</math> subjects in each of the CoVLP formulation and placebo groups.</i></li> </ul>                                                                                                                                                                                                                                                                                                                                                                                                                                                                                                                                |
| Secondary Outcomes | <ul style="list-style-type: none"> <li>• Evaluation of the efficacy of CoVLP+AS03 versus placebo at the time of the PVE analysis:             <ul style="list-style-type: none"> <li>- <i>to prevent severe COVID-19 disease starting 7 days after the 2<sup>nd</sup> dose;</i></li> <li>- <i>to prevent PCR-confirmed symptomatic SARS-CoV-2 infection starting after the first vaccination and during the following intervals: i) after the 1<sup>st</sup> dose and prior to the 2<sup>nd</sup> dose; ii) after the 2<sup>nd</sup> dose and prior to 7 days post-2<sup>nd</sup> dose;</i></li> <li>- <i>to prevent of PCR-confirmed symptomatic SARS-CoV-2 infection by strain starting 7 days after the 2<sup>nd</sup> dose;</i></li> <li>- <i>to assess the duration and intensity of viral shedding as well as symptoms after PCR-confirmed SARS-CoV-2 infection.</i></li> </ul> </li> <li>• Evaluation of the efficacy of CoVLP+AS03 versus placebo to prevent PCR-confirmed asymptomatic COVID-19 at Day 201 in D0 seronegative subjects.</li> <li>• Measurement of the following immunogenicity outcomes:</li> </ul> |



|                      |                                                                                                                                                                                                                                                                                                                                                                                                                                                                                                                                 |
|----------------------|---------------------------------------------------------------------------------------------------------------------------------------------------------------------------------------------------------------------------------------------------------------------------------------------------------------------------------------------------------------------------------------------------------------------------------------------------------------------------------------------------------------------------------|
|                      | <ul style="list-style-type: none"> <li>- In all subjects: Nab titers at Day 0 and Day 42.</li> <li>- In an immunogenicity subset: Nab titers at Day 21, Day 201 and Day 386; IgG (ELISA) titers at Day 42, Day 201 and Day 386; the ratio of Nab titers:IgG (ELISA) titers at Day 21, Day 42, Day 201 and Day 386; IFN-<math>\gamma</math> and IL4 ELISpot response at Day 42, Day 201 and Day 386.</li> <li>• <i>Assessment of the safety and tolerability of the CoVLP formulation up to the end of the study.</i></li> </ul> |
| Exploratory Outcomes | <ul style="list-style-type: none"> <li>• Evaluation of the efficacy of CoVLP+AS03 compared to placebo to prevent severe COVID-19 disease by strain <math>\geq 7</math> days after the 2<sup>nd</sup> dose at the time of the PVE analysis.</li> <li>• Evaluation of specific cell-mediated immune (CMI) response induced by CoVLP+AS03 against the SARS-CoV-2 at Day 42, Day 201 and Day 386 as measured by the percentage of CD4+ T cells expressing functional markers.</li> </ul>                                            |

**Supplementary Table S2 | Summary of Demographics in the Intention to Treat (ITT) Set**

‘N’ is the number of participants in a population, while ‘n’ represents the number of participants in a category. Race and/or ethnic group were reported by the participants, who could have listed more than one category. SD: Standard deviation; Min: Minimum; Max: Maximum.

|                                           | Healthy Adults |              | Older Adults (65+) |             | Adults with Comorbidities |              | All Participants |               |
|-------------------------------------------|----------------|--------------|--------------------|-------------|---------------------------|--------------|------------------|---------------|
|                                           | CoVLP+ AS03    | Placebo      | CoVLP+ AS03        | Placebo     | CoVLP+ AS03               | Placebo      | CoVLP+ AS03      | Placebo       |
| <b>Participants (N)</b>                   | 10,816         | 10,835       | 62                 | 65          | 1195                      | 1166         | 12,074           | 12,066        |
| <b>Sex, n (%)</b>                         |                |              |                    |             |                           |              |                  |               |
| Male                                      | 5,460 (50.5)   | 5,553 (51.3) | 35 (56.5)          | 35 (53.8)   | 612 (51.2)                | 598 (51.3)   | 6,107 (50.6)     | 6,186 (51.3)  |
| Female                                    | 5,356 (49.5)   | 5,282 (48.7) | 27 (43.5)          | 30 (46.2)   | 583 (48.8)                | 568 (48.7)   | 5,966 (49.4)     | 5,880 (48.7)  |
| <b>Race, n (%)</b>                        |                |              |                    |             |                           |              |                  |               |
| American Indian / Alaska Native           | 27 (0.2)       | 23 (0.2)     | 0                  | 0           | 3 (0.3)                   | 7 (0.6)      | 30 (0.2)         | 30 (0.2)      |
| Asian                                     | 137 (1.3)      | 137 (1.3)    | 1 (1.6)            | 0           | 11 (0.9)                  | 10 (0.9)     | 149 (1.2)        | 147 (1.2)     |
| Black / African American                  | 681 (6.3)      | 667 (6.2)    | 8 (12.9)           | 13 (20.0)   | 160 (13.4)                | 155 (13.3)   | 849 (7.0)        | 835 (6.9)     |
| Multiple                                  | 197 (1.8)      | 237 (2.2)    | 1 (1.6)            | 0           | 26 (2.2)                  | 26 (2.2)     | 224 (1.9)        | 263 (2.2)     |
| Native Hawaiian or Other Pacific Islander | 24 (0.2)       | 21 (0.2)     | 0                  | 0           | 2 (0.2)                   | 4 (0.3)      | 26 (0.2)         | 25 (0.2)      |
| White or Caucasian                        | 9,694 (89.6)   | 9,690 (89.4) | 51 (82.3)          | 51 (78.5)   | 981 (82.1)                | 959 (82.2)   | 10,726 (88.8)    | 10,700 (88.7) |
| Other                                     | 1 (<0.1)       | 2 (<0.1)     | 0                  | 0           | 0                         | 0            | 1 (<0.1)         | 2 (<0.1)      |
| Not Reported                              | 52 (0.5)       | 54 (0.5)     | 0                  | 1 (1.5)     | 10 (0.8)                  | 5 (0.4)      | 62 (0.5)         | 60 (0.5)      |
| <b>Ethnicity, n (%)</b>                   |                |              |                    |             |                           |              |                  |               |
| Hispanic or Latinx                        | 8,965 (82.9)   | 8,955 (82.6) | 15 (24.2)          | 26 (40.0)   | 915 (76.6)                | 915 (78.5)   | 9,895 (82.0)     | 9,896 (82.0)  |
| Not Hispanic or Latinx                    | 1,800 (16.6)   | 1,830 (16.9) | 47 (75.8)          | 39 (60.0)   | 273 (22.8)                | 241 (20.7)   | 2,120 (17.6)     | 2,110 (17.5)  |
| Not Reported / Specified                  | 51 (0.5)       | 50 (0.5)     | 0                  | 0           | 7 (0.6)                   | 10 (0.9)     | 58 (0.5)         | 60 (0.5)      |
| <b>Age at consent (years)</b>             |                |              |                    |             |                           |              |                  |               |
| Mean (SD)                                 | 32.0 (11.07)   | 31.9 (11.02) | 69.9 (4.15)        | 69.5 (5.00) | 38.8 (13.72)              | 39.2 (14.14) | 32.8 (11.82)     | 32.8 (11.85)  |
| Median                                    | 29.0           | 29.0         | 69.0               | 68.0        | 37.0                      | 38.0         | 29.0             | 29.0          |
| Min, Max                                  | 18, 64         | 18, 64       | 65, 80             | 65, 86      | 18, 82                    | 18, 86       | 18, 82           | 18, 86        |

**Supplementary Table S3 | Summary of Demographics in the Per Protocol set**

‘N’ is the number of participants in a population, while ‘n’ represents the number of participants in a category. Race and/or ethnic group were as reported by the participants (who could have listed more than one category). SD: Standard deviation; Min: Minimum; Max: Maximum.

|                                           | Healthy Adults |              | Older Adults (65+) |             | Adults with Comorbidities |              | All Participants |              |
|-------------------------------------------|----------------|--------------|--------------------|-------------|---------------------------|--------------|------------------|--------------|
|                                           | CoVLP+ AS03    | Placebo      | CoVLP+ AS03        | Placebo     | CoVLP+ AS03               | Placebo      | CoVLP+ AS03      | Placebo      |
| <b>Participants (N)</b>                   | 9,541          | 8,609        | 55                 | 54          | 958                       | 873          | 10,554           | 9,536        |
| <b>Sex, n (%)</b>                         |                |              |                    |             |                           |              |                  |              |
| Male                                      | 4,764 (49.9)   | 4,324 (50.2) | 30 (54.5)          | 27 (50.0)   | 474 (49.5)                | 441 (50.5)   | 5,268 (49.9)     | 4,792 (50.3) |
| Female                                    | 4,777 (50.1)   | 4,285 (49.8) | 25 (45.5)          | 27 (50.0)   | 484 (50.5)                | 432 (49.5)   | 5,286 (50.1)     | 4,744 (49.7) |
| <b>Race, n (%)</b>                        |                |              |                    |             |                           |              |                  |              |
| American Indian / Alaska Native           | 21 (0.2)       | 15 (0.2)     | 0                  | 0           | 1 (0.1)                   | 4 (0.5)      | 22 (0.2)         | 19 (0.2)     |
| Asian                                     | 116 (1.2)      | 94 (1.1)     | 1 (1.8)            | 0           | 9 (0.9)                   | 7 (0.8)      | 126 (1.2)        | 101 (1.1)    |
| Black / African American                  | 449 (4.7)      | 434 (5.0)    | 7 (12.7)           | 9 (16.7)    | 101 (10.5)                | 97 (11.1)    | 557 (5.3)        | 540 (5.7)    |
| Multiple                                  | 177 (1.9)      | 183 (2.1)    | 1 (1.8)            | 0           | 22 (2.3)                  | 17 (1.9)     | 200 (1.9)        | 200 (2.1)    |
| Native Hawaiian or Other Pacific Islander | 19 (0.2)       | 14 (0.2)     | 0                  | 0           | 2 (0.2)                   | 4 (0.5)      | 21 (0.2)         | 18 (0.2)     |
| White or Caucasian                        | 8,720 (91.4)   | 7,835 (91.0) | 45 (81.8)          | 45 (83.3)   | 817 (85.3)                | 743 (85.1)   | 9,582 (90.8)     | 8,623 (90.4) |
| Other                                     | 1 (<0.1)       | 1 (<0.1)     | 0                  | 0           | 0                         | 0            | 1 (<0.1)         | 1 (<0.1)     |
| Not Reported                              | 35 (0.4)       | 29 (0.3)     | 0                  | 0           | 5 (0.5)                   | 1 (0.1)      | 40 (0.4)         | 30 (0.3)     |
| <b>Ethnicity, n (%)</b>                   |                |              |                    |             |                           |              |                  |              |
| Hispanic or Latinx                        | 8,076 (84.6)   | 7,171 (83.3) | 13 (23.6)          | 22 (40.7)   | 761 (79.4)                | 698 (80.0)   | 8,850 (83.9)     | 7,891 (82.7) |
| Not Hispanic or Latinx                    | 1,428 (15.0)   | 1,409 (16.4) | 42 (76.4)          | 32 (59.3)   | 196 (20.5)                | 171 (19.6)   | 1,666 (15.8)     | 1,612 (16.9) |
| Not Reported / Specified                  | 37 (0.4)       | 29 (0.3)     | 0                  | 0           | 1 (0.1)                   | 4 (0.5)      | 38 (0.4)         | 33 (0.3)     |
| <b>Age at consent (years)</b>             |                |              |                    |             |                           |              |                  |              |
| Mean (SD)                                 | 31.8 (10.98)   | 31.9 (11.13) | 69.9 (4.30)        | 69.8 (5.09) | 38.7 (13.74)              | 40.2 (14.37) | 32.6 (11.72)     | 32.9 (12.01) |
| Median                                    | 29.0           | 29.0         | 69.0               | 68.0        | 37.0                      | 39.0         | 29.0             | 29.0         |
| Min, Max                                  | 18, 64         | 18, 64       | 65, 80             | 65, 86      | 18, 82                    | 18, 86       | 18, 82           | 18, 86       |

**Supplementary Table S4 | Baseline Comorbidities**

‘N’ is the total number of participants who received a given vaccination. ‘n’ is the number of participants who reported the specified comorbid condition and is shown as a percentage in brackets. Comorbidities reported for  $\leq 0.1\%$  of the total population have not been included.

| <b>n (%)</b>                                      | <b>CoVLP+AS03<br/>N = 12036</b> | <b>Placebo<br/>N = 12040</b> | <b>Total<br/>N = 24076</b> |
|---------------------------------------------------|---------------------------------|------------------------------|----------------------------|
| <b>Participants with at least one comorbidity</b> | <b>1781 (14.8)</b>              | <b>1686 (14.0)</b>           | <b>3467 (14.4)</b>         |
| Obesity                                           | 1246 (10.4)                     | 1171 (9.7)                   | 2417 (10.0)                |
| Documented Hypertension                           | 340 (2.8)                       | 322 (2.8)                    | 672 (2.8)                  |
| Type 2 Diabetes                                   | 116 (1.0)                       | 100 (0.8)                    | 216 (0.9)                  |
| Chronic Obstructive Lung disease (COPD)           | 41 (0.3)                        | 45 (0.4)                     | 86 (0.4)                   |
| Immunocompromised                                 | 48 (0.4)                        | 40 (0.3)                     | 88 (0.4)                   |
| Cardiovascular disease                            | 40 (0.3)                        | 41 (0.3)                     | 81 (0.3)                   |
| Asthma                                            | 25 (0.2)                        | 17 (0.1)                     | 42 (0.2)                   |

**Supplementary Table S5 | Representativeness of Study Participants**

| <b>Vaccine Efficacy and Safety after 2 doses of CoVLP+AS03 vaccine candidate</b>                                                                                                                                                                                                                                                                                                                                                                                                                                                                                                                                                                                                                                                                                                                                                                                                                    |                                                                                                                                                                                                                                                                                                                                                                                                                                                                                                                                                                                                                                                                                                                                                                                                                                                                          |
|-----------------------------------------------------------------------------------------------------------------------------------------------------------------------------------------------------------------------------------------------------------------------------------------------------------------------------------------------------------------------------------------------------------------------------------------------------------------------------------------------------------------------------------------------------------------------------------------------------------------------------------------------------------------------------------------------------------------------------------------------------------------------------------------------------------------------------------------------------------------------------------------------------|--------------------------------------------------------------------------------------------------------------------------------------------------------------------------------------------------------------------------------------------------------------------------------------------------------------------------------------------------------------------------------------------------------------------------------------------------------------------------------------------------------------------------------------------------------------------------------------------------------------------------------------------------------------------------------------------------------------------------------------------------------------------------------------------------------------------------------------------------------------------------|
| Special considerations related to                                                                                                                                                                                                                                                                                                                                                                                                                                                                                                                                                                                                                                                                                                                                                                                                                                                                   |                                                                                                                                                                                                                                                                                                                                                                                                                                                                                                                                                                                                                                                                                                                                                                                                                                                                          |
| Gender                                                                                                                                                                                                                                                                                                                                                                                                                                                                                                                                                                                                                                                                                                                                                                                                                                                                                              | <p>A gender effect has been observed resulting in higher risk to develop severe disease in males<sup>3-7</sup>.</p> <p>Although gender effects on immune responses are well documented, no statistically significant gender effects have been reported on either immunogenicity or efficacy of COVID-19 vaccines or candidate vaccines to our knowledge.</p>                                                                                                                                                                                                                                                                                                                                                                                                                                                                                                             |
| Age and Comorbidities                                                                                                                                                                                                                                                                                                                                                                                                                                                                                                                                                                                                                                                                                                                                                                                                                                                                               | <p>Elderly and people with comorbidities are more susceptible to complications and severe COVID-19<sup>3,7,8</sup>. Comorbidities including, but not limited to, obesity, diabetes, renal failure, hypertension, cardiovascular or chronic obstructive pulmonary diseases, can significantly worsen clinical outcome during COVID-19.</p> <p>Vaccine efficacy and immunogenicity may decrease with age although no statistically significant age-related reduction in vaccine efficacy has been reported with currently used COVID-19 vaccines or vaccine candidates during phase 3 clinical trials.</p>                                                                                                                                                                                                                                                                 |
| Race or Ethnic groups                                                                                                                                                                                                                                                                                                                                                                                                                                                                                                                                                                                                                                                                                                                                                                                                                                                                               | <p>In the United States, African American and Hispanic/Latinx individuals were generally over-represented (although relative representation varied over the waves and depending on the variants) in cases, hospitalizations and deaths; mainly due to socio-economic factors and over-representation of these populations among frontline healthcare workers<sup>3,9</sup>.</p>                                                                                                                                                                                                                                                                                                                                                                                                                                                                                          |
| Overall Representativeness of this Trial                                                                                                                                                                                                                                                                                                                                                                                                                                                                                                                                                                                                                                                                                                                                                                                                                                                            | <p>Both sexes are equally represented in our study. Adults with comorbidities represent 9.8% of the subjects in our study (9.7% Placebo versus 9.9% Active Vaccine).</p> <p>Due to active vaccine roll-out in elderly prior to and at the time of this study, people aged <math>\geq 65</math> years only represent 0.53% of our study population.</p> <p>Participants reporting Hispanic/Latinx ethnicity represented &gt;80% of the study population illustrating the contribution of clinical sites located in South America. Despite efforts to locate study sites in areas with high Black or African Americans populations and active outreach, there was a lower willingness to participate in the vaccine clinical trial resulting into a lower than expected enrolment (5.5%) among that population as has been seen in other phase 3 studies<sup>10</sup>.</p> |
| <p><b>Note:</b> The potential impacts of age, comorbid conditions and sex on clinical co-outcomes were clearly identified during the early stages of the pandemic and were taken into consideration in designing this clinical trial. The possible impact of race or ethnic groups is strongly influenced by socio-economic factors and often depends on the geographic area. In this table, we focused on the situation in the United States. The information summarized in this table was obtained by interrogating large databases including PubMed, CDC website, the WHO website and MedRxiv with <i>ad hoc</i> terms including 'gender or gender impact/effect', 'sex or sex impact/effect', 'comorbidity or comorbid conditions', 'elderly or age effect/impact', 'risk factors', 'at risk populations' combined with 'COVID-19'. References are provided to support selected statements.</p> |                                                                                                                                                                                                                                                                                                                                                                                                                                                                                                                                                                                                                                                                                                                                                                                                                                                                          |

**Supplementary Table S6 | Demographics According to Study Discontinuation**

‘N’ is the number of participants in a population (ITT for demographics, SAS for safety analysis set), while ‘n’ represents the number of participants in a category. Race and/or ethnic group were as reported by the participants (who could have listed more than one category). The ‘discontinued’ population includes individuals who left the study due to adverse events, death, loss to follow-up, non-compliance, physician/investigator decision, sponsor decision, withdrawal of consent, withdrawal to receive a deployed vaccine, or for other reasons. This population does not include individuals who discontinued for unknown reasons (see Figure 1). Two individuals in the ITT set could not be attributed to the ‘discontinued’ or ‘continued’ groups. SD: Standard deviation; Min: Minimum; Max: Maximum; AE: Adverse Event.

|                                           | DISCONTINUED |              | CONTINUED     |              |
|-------------------------------------------|--------------|--------------|---------------|--------------|
|                                           | CoVLP+ AS03  | Placebo      | CoVLP+ AS03   | Placebo      |
| <b>Participants in ITT (N)</b>            | <b>1,507</b> | <b>4,566</b> | <b>10,566</b> | <b>7,500</b> |
| <b>Sex, n (%)</b>                         |              |              |               |              |
| Male                                      | 827 (54.9)   | 2,405 (52.7) | 5,280 (50.0)  | 3,719 (49.6) |
| Female                                    | 680 (45.1)   | 2,161 (47.3) | 5,286 (50.0)  | 3,781 (50.4) |
| <b>Race, n (%)</b>                        |              |              |               |              |
| American Indian/ Alaska Native            | 9 (0.6)      | 13 (0.3)     | 21 (0.2)      | 17 (0.2)     |
| Asian                                     | 39 (2.6)     | 96 (2.1)     | 110 (1.0)     | 51 (0.7)     |
| Black/ African American                   | 200 (13.3)   | 319 (7.0)    | 649 (6.2)     | 516 (6.9)    |
| Multiple                                  | 21 (1.4)     | 159 (3.5)    | 203 (1.9)     | 104 (1.4)    |
| Native Hawaiian or Other Pacific Islander | 4 (0.3)      | 16 (0.4)     | 22 (0.2)      | 9 (0.1)      |
| White or Caucasian                        | 1,222 (81.1) | 3,927 (86.0) | 9,504 (90.0)  | 6,773 (90.4) |
| Other                                     | 0            | 2 (<0.1)     | 1 (<0.1)      | 0            |
| Not Reported                              | 12 (0.8)     | 34 (0.7)     | 50 (0.5)      | 26 (0.4)     |
| <b>Ethnicity, n (%)</b>                   |              |              |               |              |
| Hispanic or Latinx                        | 913 (60.6)   | 3,548 (77.7) | 8,982 (85.0)  | 6,348 (84.6) |
| Not Hispanic or Latinx                    | 579 (38.4)   | 987 (21.7)   | 1,541 (14.6)  | 1,123 (15.0) |
| Not Reported/ Specified                   | 15 (1.0)     | 31 (0.7)     | 43 (0.4)      | 29 (0.4)     |
| <b>Age at consent (years)</b>             |              |              |               |              |
| Mean (SD)                                 | 33.2 (11.8)  | 30.3 (10.1)  | 32.8 (11.8)   | 34.3 (12.6)  |
| Median                                    | 30           | 27           | 29            | 31           |
| Min, Max                                  | 18, 73       | 18, 79       | 18, 82        | 18, 86       |
| <b>Solicited AEs</b>                      |              |              |               |              |
| Participants in SAS (N)                   | 536          | 1,794        | 3,600         | 1,889        |
| ≥1 Solicited Local AE                     | 478 (89.2)   | 862 (48.0)   | 3,341 (92.8)  | 815 (43.1)   |
| ≥1 Solicited Systemic AE                  | 465 (86.8)   | 1223 (68.2)  | 3,147 (87.4)  | 1,171 (62.0) |
| ≥Grade 3 Solicited AE                     | 30 (5.6)     | 22 (1.2)     | 223 (6.2)     | 23 (1.2)     |

**Supplementary Table S7 | Efficacy by Subgroup (Per Protocol Set)**

For most subgroups, values indicate the number of positive cases and total number of participants in the subgroup. Numbers in parenthesis indicate the incidence rate per person years. For variants, values indicate number of sequenced cases assigned to the variant and in parenthesis the incidence rate per person years. Yrs indicate years, 95% CI indicates 95% confidence interval, VE indicates Vaccine Efficacy and NA indicates not applicable.

| <b>Subgroup</b>                    | <b>Placebo</b><br># pos/# in subgroup (incidence rate) | <b>CoVLP+AS03</b> | <b>VE (95% CI)</b>   |
|------------------------------------|--------------------------------------------------------|-------------------|----------------------|
| <b>All Participants</b>            | 118/9,536 (0.179)                                      | 39/10,554 (0.052) | 71.0 (58.7, 80.0)    |
| <b>Baseline Health, Age</b>        |                                                        |                   |                      |
| Healthy, ≥18 to <65 yrs            | 106/8,609 (0.179)                                      | 35/9,541 (0.052)  | 70.9 (57.7, 80.4)    |
| Healthy, ≥65 yrs                   | 1/54 (0.119)                                           | 1/55 (0.097)      | 18.4 (-3083.7, 97.9) |
| Significant comorbidities, ≥18 yrs | 11/873 (0.187)                                         | 3/958 (0.043)     | 76.8 (21.5, 94.8)    |
| <b>Sex</b>                         |                                                        |                   |                      |
| Male                               | 56/4,792 (0.158)                                       | 21/5,268 (0.052)  | 67.0 (46.0, 80.4)    |
| Female                             | 62/4,744 (0.204)                                       | 18/5,286 (0.052)  | 74.7 (57.8, 85.4)    |
| <b>Race or Ethnic Group</b>        |                                                        |                   |                      |
| Asian                              | 2/101 (0.135)                                          | 0/126 (0)         | 100.0 (-153.3, NA)   |
| Black or African American          | 8/540 (0.116)                                          | 4/557 (0.055)     | 52.6 (-56.7, 87.6)   |
| White or Caucasian                 | 101/8,623 (0.183)                                      | 34/9,582 (0.054)  | 70.7 (57.1, 80.4)    |
| Latinx or Hispanic                 | 85/7,891 (0.081)                                       | 30/8,850 (0.027)  | 71.0 (56.4, 81.2)    |
| Not Latinx or Hispanic             | 33/1,612 (0.066)                                       | 9/1,666 (0.017)   | 74.0 (47.1, 88.3)    |
| <b>Disease Severity</b>            |                                                        |                   |                      |
| Moderate                           | 30/9,536 (0.046)                                       | 8/10,554 (0.011)  | 76.6 (50.5, 90.0)    |
| Moderate/Severe                    | 32/9,536 (0.049)                                       | 8/10,554 (0.011)  | 78.1 (53.9, 90.5)    |
| Severe                             | 2/9,536 (0.003)                                        | 0/10,554 (0)      | 100 (-204.4, NA)     |
| <b>Seropositivity at Baseline</b>  |                                                        |                   |                      |
| Seropositive                       | 3/1,390 (0.036)                                        | 6/1,461 (0.069)   | -88.8 (-825.1, 53.0) |
| Seronegative                       | 114/8,033 (0.200)                                      | 32/8,975 (0.049)  | 75.6 (64.2, 83.7)    |
| <b>Variants</b>                    |                                                        |                   |                      |
| Ancestral                          | 0 (0)                                                  | 0 (0)             | NA                   |
| Alpha                              | 5 (0.008)                                              | 0 (0)             | 100 (28.0, NA)       |
| Beta                               | 0 (0)                                                  | 0 (0)             | NA                   |
| Gamma                              | 46 (0.070)                                             | 6 (0.008)         | 88.6 (74.6, 95.6)    |
| Delta                              | 39 (0.059)                                             | 11 (0.015)        | 75.3 (52.8, 87.9)    |
| Lambda                             | 3 (0.005)                                              | 0 (0)             | 100.0 (-50.3, NA)    |
| Mu                                 | 4 (0.006)                                              | 0 (0)             | 100 (2.3, NA)        |
| Omicron                            | 0 (0)                                                  | 0 (0)             | NA                   |
| Sequencing Failure                 | 7 (0.011)                                              | 14 (0.001)        | -128 (-615.0, 16.4)  |

**Supplementary Table S8 | Redistribution of Sequencing Failures among Variants**

Because 12.7% of the cases could not be sequenced and sequencing failures were not evenly distributed between CoVLP+AS03 and placebo arms, we conducted a sensitivity analysis to assess the possible impact of the missing data on variant-specific efficacy estimates. This analysis consisted of a “hot deck” imputation incorporating calendar time, participant country of residence, and trial arm. In the first step, the sequenced data were put into cells formed by a cross tabulation of the quintiles of calendar time of sample collection and country. Then for each cell, the proportional distribution across variants was used to allocate the non-sequenced samples in each cell (resulting mainly in fractional cases). In the next step, the statistician doing the calculations (LM) unblinded the CoVLP:Placebo distribution in each cell, to further split each cell’s imputed contents in two. Finally, the imputed case contributions for each variant in each arm were summed over its 20 time-country cells, added to the corresponding totals of the known sequences, and then used to calculate efficacy by variant.

| Variant                       | Observed<br>Placebo<br>Cases | Observed<br>CoVLP<br>+AS03<br>Cases | Observed<br>Efficacy<br>(%) | Imputed<br>Placebo<br>Cases | Imputed<br>CoVLP<br>+AS03<br>Cases | Imputed<br>Efficacy<br>(%) |
|-------------------------------|------------------------------|-------------------------------------|-----------------------------|-----------------------------|------------------------------------|----------------------------|
| Alpha                         | 6                            | 0                                   | 100.0                       | 6.1                         | 0.6                                | 91.0                       |
| Gamma                         | 47                           | 6                                   | 87.8                        | 50.1                        | 14.9                               | 71.6                       |
| Delta                         | 44                           | 12                                  | 74.0                        | 45.6                        | 17.3                               | 63.8                       |
| Lambda                        | 3                            | 0                                   | 100.0                       | 3.1                         | 0.9                                | 72.0                       |
| Mu                            | 4                            | 0                                   | 100.0                       | 4.0                         | 0.3                                | 92.5                       |
| <i>Sequencing<br/>Failure</i> | 7                            | 14                                  |                             |                             |                                    |                            |
| <b>Total</b>                  | 111                          | 32                                  | 72.5                        | 108.9                       | 34.0                               | 70.2                       |



**Supplementary Table S9 | Incidence of Solicited Local Adverse Events (SAS)**

‘N’ is the total number of participants in the Safety Analysis Set (SAS) who received a given vaccination. ‘n’ is the number of a participants reporting at least 1 occurrence of the specified event category and is shown as a percentage in brackets. For each category, Grade 1 = Mild; Grade 2 = Moderate; Grade 3 = Severe; Grade 4 = Potentially life threatening. If a participant had the same AE but with different grades over time, the highest grade was reported. ‘Missing’ rows counted participants within the population if they did not have a non-missing assessment or had an assessment with a non-graded value.

| n (%)                        | Vaccination 1      |                    | Vaccination 2      |                    | Overall            |                    |
|------------------------------|--------------------|--------------------|--------------------|--------------------|--------------------|--------------------|
|                              | CoVLP+ AS03        | Placebo            | CoVLP+ AS03        | Placebo            | CoVLP+ AS03        | Placebo            |
|                              | N = 4 136          | N = 3 683          | N = 4 136          | N = 3 683          | N = 4 136          | N = 3 683          |
| <b>≥1 solicited local AE</b> | <b>3538 (85.5)</b> | <b>1149 (31.2)</b> | <b>3496 (84.5)</b> | <b>1135 (30.8)</b> | <b>3819 (92.3)</b> | <b>1677 (45.5)</b> |
| Grade 1                      | 3021 (73.0)        | 1123 (30.5)        | 2494 (60.3)        | 1111 (30.2)        | 2590 (62.6)        | 1629 (44.2)        |
| Grade 2                      | 484 (11.7)         | 24 (0.7)           | 917 (22.2)         | 23 (0.6)           | 1115 (27.0)        | 45 (1.2)           |
| Grade 3                      | 33 (0.8)           | 2 (<0.1)           | 85 (2.1)           | 1 (<0.1)           | 114 (2.8)          | 3 (<0.1)           |
| Grade 4                      | 0                  | 0                  | 0                  | 0                  | 0                  | 0                  |
| Missing                      | 4 (<0.1)           | 6 (0.2)            | 74 (1.8)           | 12 (0.3)           | 2 (<0.1)           | 5 (0.1)            |
| <b>Pain</b>                  | <b>3514 (85.0)</b> | <b>1082 (29.4)</b> | <b>3483 (84.2)</b> | <b>1100 (29.9)</b> | <b>3806 (92.0)</b> | <b>1604 (43.6)</b> |
| Grade 1                      | 3072 (74.3)        | 1066 (28.9)        | 2625 (63.5)        | 1080 (29.3)        | 2758 (66.7)        | 1570 (42.6)        |
| Grade 2                      | 420 (10.2)         | 15 (0.4)           | 830 (20.1)         | 20 (0.5)           | 999 (24.2)         | 33 (0.9)           |
| Grade 3                      | 22 (0.5)           | 1 (<0.1)           | 28 (0.7)           | 0                  | 49 (1.2)           | 1 (<0.1)           |
| Grade 4                      | 0                  | 0                  | 0                  | 0                  | 0                  | 0                  |
| Missing                      | 4 (<0.1)           | 6 (0.2)            | 74 (1.8)           | 12 (0.3)           | 2 (<0.1)           | 5 (0.1)            |
| <b>Redness</b>               | <b>281 (6.8)</b>   | <b>107 (2.9)</b>   | <b>633 (15.3)</b>  | <b>77 (2.1)</b>    | <b>815 (19.7)</b>  | <b>167 (4.5)</b>   |
| Grade 1                      | 238 (5.8)          | 101 (2.7)          | 446 (10.8)         | 75 (2.0)           | 596 (14.4)         | 159 (4.3)          |
| Grade 2                      | 36 (0.9)           | 5 (0.1)            | 145 (3.5)          | 1 (<0.1)           | 172 (4.2)          | 6 (0.2)            |
| Grade 3                      | 7 (0.2)            | 1 (<0.1)           | 42 (1.0)           | 1 (<0.1)           | 47 (1.1)           | 2 (<0.1)           |
| Grade 4                      | 0                  | 0                  | 0                  | 0                  | 0                  | 0                  |
| Missing                      | 6 (0.1)            | 8 (0.2)            | 76 (1.8)           | 13 (0.4)           | 3 (<0.1)           | 5 (0.1)            |
| <b>Swelling</b>              | <b>774 (18.7)</b>  | <b>108 (2.9)</b>   | <b>1241 (30.0)</b> | <b>113 (3.1)</b>   | <b>1548 (37.4)</b> | <b>200 (5.4)</b>   |
| Grade 1                      | 660 (16.0)         | 100 (2.7)          | 974 (23.5)         | 110 (3.0)          | 1211 (29.3)        | 189 (5.1)          |
| Grade 2                      | 102 (2.5)          | 7 (0.2)            | 240 (5.8)          | 3 (<0.1)           | 300 (7.3)          | 10 (0.3)           |
| Grade 3                      | 12 (0.3)           | 1 (<0.1)           | 27 (0.7)           | 0                  | 37 (0.9)           | 1 (<0.1)           |
| Grade 4                      | 0                  | 0                  | 0                  | 0                  | 0                  | 0                  |
| Missing                      | 5 (0.1)            | 6 (0.2)            | 74 (1.8)           | 12 (0.3)           | 2 (<0.1)           | 5 (0.1)            |

**Supplementary Table S10 | Incidence of Solicited Systemic Adverse Events (SAS)**

‘N’ is the total number of participants in the Safety Analysis Set (SAS) who received a given vaccination. ‘n’ is the number of a participants reporting at least 1 occurrence of the specified event category and is shown as a percentage in brackets. For each category, Grade 1 = Mild; Grade 2 = Moderate; Grade 3 = Severe; Grade 4 = Potentially life threatening. If a participant had the same AE but with different grades over time, the highest grade was reported. ‘Missing’ rows counted participants within the population if they did not have a non-missing assessment or had an assessment with a non-graded value. Medically implausible fever temperature values were excluded from table.

| n (%)                                | Vaccination 1                |                              | Vaccination 2                |                              | Overall                      |                              |
|--------------------------------------|------------------------------|------------------------------|------------------------------|------------------------------|------------------------------|------------------------------|
|                                      | CoVLP+ AS03                  | Placebo                      | CoVLP+ AS03                  | Placebo                      | CoVLP+ AS03                  | Placebo                      |
|                                      | N = 4 136                    | N = 3 683                    | N = 4 136                    | N = 3 683                    | N = 4 136                    | N = 3 683                    |
| <b>≥1 solicited systemic AE</b>      | <b>2835</b><br><b>(68.5)</b> | <b>2023</b><br><b>(54.9)</b> | <b>3190</b><br><b>(77.1)</b> | <b>1517</b><br><b>(41.2)</b> | <b>3612</b><br><b>(87.3)</b> | <b>2394</b><br><b>(65.0)</b> |
| Grade 1                              | 2017<br>(48.8)               | 1602<br>(43.5)               | 1388<br>(33.6)               | 1147<br>(31.1)               | 1538<br>(37.2)               | 1734<br>(47.1)               |
| Grade 2                              | 776<br>(18.8)                | 397<br>(10.8)                | 1671<br>(40.4)               | 349<br>(9.5)                 | 1906<br>(46.1)               | 617<br>(16.8)                |
| Grade 3                              | 42 (1.0)                     | 24 (0.7)                     | 129 (3.1)                    | 20 (0.5)                     | 166 (4.0)                    | 42 (1.1)                     |
| Grade 4                              | 0                            | 0                            | 2 (<0.1)                     | 1 (<0.1)                     | 2 (<0.1)                     | 1 (<0.1)                     |
| Missing                              | 2 (<0.1)                     | 6 (0.2)                      | 72 (1.7)                     | 12 (0.3)                     | 2 (<0.1)                     | 5 (0.1)                      |
| <b>Chills</b>                        | <b>571</b><br><b>(13.8)</b>  | <b>352</b><br><b>(9.6)</b>   | <b>1693</b><br><b>(40.9)</b> | <b>263</b><br><b>(7.1)</b>   | <b>1889</b><br><b>(45.7)</b> | <b>522</b><br><b>(14.2)</b>  |
| Grade 1                              | 469 (11.3)                   | 314 (8.5)                    | 966 (23.4)                   | 228 (6.2)                    | 1 108 (26.8)                 | 451 (12.2)                   |
| Grade 2                              | 98 (2.4)                     | 38 (1.0)                     | 702 (17.0)                   | 34 (0.9)                     | 753 (18.2)                   | 70 (1.9)                     |
| Grade 3                              | 4 (<0.1)                     | 0                            | 24 (0.6)                     | 1 (<0.1)                     | 27 (0.7)                     | 1 (<0.1)                     |
| Grade 4                              | 0                            | 0                            | 1 (<0.1)                     | 0                            | 1 (<0.1)                     | 0                            |
| Missing                              | 8 (0.2)                      | 9 (0.2)                      | 74 (1.8)                     | 12 (0.3)                     | 2 (<0.1)                     | 5 (0.1)                      |
| <b>Fatigue</b>                       | <b>1490</b><br><b>(36.0)</b> | <b>1038</b><br><b>(28.2)</b> | <b>2277</b><br><b>(55.1)</b> | <b>792</b><br><b>(21.5)</b>  | <b>2634</b><br><b>(63.7)</b> | <b>1352</b><br><b>(36.7)</b> |
| Grade 1                              | 1144<br>(27.7)               | 820<br>(22.3)                | 1270<br>(30.7)               | 638<br>(17.3)                | 1460<br>(35.3)               | 1018<br>(27.6)               |
| Grade 2                              | 332 (8.0)                    | 206 (5.6)                    | 942 (22.8)                   | 142 (3.9)                    | 1096 (26.5)                  | 311 (8.4)                    |
| Grade 3                              | 14 (0.3)                     | 12 (0.3)                     | 65 (1.6)                     | 12 (0.3)                     | 78 (1.9)                     | 23 (0.6)                     |
| Grade 4                              | 0                            | 0                            | 0                            | 0                            | 0                            | 0                            |
| Missing                              | 8 (0.2)                      | 8 (0.2)                      | 72 (1.7)                     | 12 (0.3)                     | 2 (<0.1)                     | 5 (0.1)                      |
| <b>Feeling of General Discomfort</b> | <b>1200</b><br><b>(29.0)</b> | <b>699</b><br><b>(19.0)</b>  | <b>2280</b><br><b>(55.1)</b> | <b>574</b><br><b>(15.6)</b>  | <b>2595</b><br><b>(62.7)</b> | <b>1002</b><br><b>(27.2)</b> |
| Grade 1                              | 907<br>(21.9)                | 582<br>(15.8)                | 1154<br>(27.9)               | 459<br>(12.5)                | 1341<br>(32.4)               | 784<br>(21.3)                |
| Grade 2                              | 278<br>(6.7)                 | 111<br>(3.0)                 | 1089<br>(26.3)               | 109<br>(3.0)                 | 1203<br>(29.1)               | 207<br>(5.6)                 |
| Grade 3                              | 15 (0.4)                     | 6 (0.2)                      | 36 (0.9)                     | 6 (0.2)                      | 50 (1.2)                     | 11 (0.3)                     |
| Grade 4                              | 0                            | 0                            | 1 (<0.1)                     | 0                            | 1 (<0.1)                     | 0                            |
| Missing                              | 8 (0.2)                      | 9 (0.2)                      | 74 (1.8)                     | 13 (0.4)                     | 2 (<0.1)                     | 5 (0.1)                      |

| n (%)                                             | Vaccination 1      |                    | Vaccination 2       |                   | Overall            |                    |
|---------------------------------------------------|--------------------|--------------------|---------------------|-------------------|--------------------|--------------------|
|                                                   | CoVLP+ AS03        | Placebo            | CoVLP+ AS03         | Placebo           | CoVLP+ AS03        | Placebo            |
|                                                   | N = 4 136          | N = 3 683          | N = 4 136           | N = 3 683         | N = 4 136          | N = 3 683          |
| <b>Feeling of Swelling in the Axilla (Armpit)</b> | <b>266 (6.4)</b>   | <b>123 (3.3)</b>   | <b>461 (11.1)</b>   | <b>71 (1.9)</b>   | <b>613 (14.8)</b>  | <b>182 (4.9)</b>   |
| Grade 1                                           | 233 (5.6)          | 121 (3.3)          | 389 (9.4)           | 66 (1.8)          | 515 (12.5)         | 175 (4.8)          |
| Grade 2                                           | 32 (0.8)           | 2 (<0.1)           | 70 (1.7)            | 5 (0.1)           | 95 (2.3)           | 7 (0.2)            |
| Grade 3                                           | 1 (<0.1)           | 0                  | 2 (<0.1)            | 0                 | 3 (<0.1)           | 0                  |
| Grade 4                                           | 0                  | 0                  | 0                   | 0                 | 0                  | 0                  |
| Missing                                           | 8 (0.2)            | 9 (0.2)            | 75 (1.8)            | 13 (0.4)          | 3 (<0.1)           | 5 (0.1)            |
| <b>Feeling of Swelling in the Neck</b>            | <b>475 (11.5)</b>  | <b>328 (8.9)</b>   | <b>632 (15.3)</b>   | <b>245 (6.7)</b>  | <b>905 (21.9)</b>  | <b>484 (13.1)</b>  |
| Grade 1                                           | 427 (10.3)         | 298 (8.1)          | 514 (12.4)          | 217 (5.9)         | 746 (18.0)         | 432 (11.7)         |
| Grade 2                                           | 46 (1.1)           | 28 (0.8)           | 112 (2.7)           | 28 (0.8)          | 151 (3.7)          | 50 (1.4)           |
| Grade 3                                           | 2 (<0.1)           | 2 (<0.1)           | 6 (0.1)             | 0                 | 8 (0.2)            | 2 (<0.1)           |
| Grade 4                                           | 0                  | 0                  | 0                   | 0                 | 0                  | 0                  |
| Missing                                           | 8 (0.2)            | 9 (0.2)            | 75 (1.8)            | 13 (0.4)          | 3 (<0.1)           | 5 (0.1)            |
| <b>Fever</b>                                      | <b>44 (1.1)</b>    | <b>34 (0.9)</b>    | <b>355 (8.6)</b>    | <b>18 (0.5)</b>   | <b>390 (9.4)</b>   | <b>52 (1.4)</b>    |
| Grade 1                                           | 31 (0.7)           | 26 (0.7)           | 259 (6.3)           | 10 (0.3)          | 282 (6.8)          | 36 (1.0)           |
| Grade 2                                           | 10 (0.2)           | 7 (0.2)            | 70 (1.7)            | 6 (0.2)           | 79 (1.9)           | 13 (0.4)           |
| Grade 3                                           | 3 (<0.1)           | 1 (<0.1)           | 25 (0.6)            | 2 (<0.1)          | 28 (0.7)           | 3 (<0.1)           |
| Grade 4                                           | 0                  | 0                  | 1 (<0.1)            | 0                 | 1 (<0.1)           | 0                  |
| Missing                                           | 59 (1.4)           | 59 (1.6)           | 92 (2.2)            | 27 (0.7)          | 8 (0.2)            | 11 (0.3)           |
| <b>Headache</b>                                   | <b>1644 (39.7)</b> | <b>1299 (35.3)</b> | <b>2325 (56.2)</b>  | <b>940 (25.5)</b> | <b>2786 (67.4)</b> | <b>1662 (45.1)</b> |
| Grade 1                                           | 1288 (31.1)        | 1089 (29.6)        | 1363 (33.0)         | 732 (19.9)        | 1634 (39.5)        | 1300 (35.3)        |
| Grade 2                                           | 342 (8.3)          | 200 (5.4)          | 927 (22.4)          | 196 (5.3)         | 1105 (26.7)        | 341 (9.3)          |
| Grade 3                                           | 14 (0.3)           | 10 (0.3)           | 34 (0.8)            | 11 (0.3)          | 46 (1.1)           | 20 (0.5)           |
| Grade 4                                           | 0                  | 0                  | 1 (<0.1)            | 1 (<0.1)          | 1 (<0.1)           | 1 (<0.1)           |
| Missing                                           | 6 (0.1)            | 9 (0.2)            | 74 (1.8)            | 13 (0.4)          | 2 (<0.1)           | 5 (0.1)            |
| <b>Joint Aches</b>                                | <b>642 (15.5)</b>  | <b>406 (11.0)</b>  | <b>1 361 (32.9)</b> | <b>313 (8.5)</b>  | <b>1627 (39.3)</b> | <b>595 (16.2)</b>  |
| Grade 1                                           | 510 (12.3)         | 355 (9.6)          | 838 (20.3)          | 268 (7.3)         | 1028 (24.9)        | 502 (13.6)         |
| Grade 2                                           | 129 (3.1)          | 47 (1.3)           | 504 (12.2)          | 44 (1.2)          | 578 (14.0)         | 88 (2.4)           |
| Grade 3                                           | 3 (<0.1)           | 4 (0.1)            | 19 (0.5)            | 1 (<0.1)          | 21 (0.5)           | 5 (0.1)            |
| Grade 4                                           | 0                  | 0                  | 0                   | 0                 | 0                  | 0                  |
| Missing                                           | 8 (0.2)            | 8 (0.2)            | 72 (1.7)            | 12 (0.3)          | 2 (<0.1)           | 5 (0.1)            |
| <b>Muscle Aches</b>                               | <b>1768 (42.7)</b> | <b>771 (20.9)</b>  | <b>2273 (55.0)</b>  | <b>617 (16.8)</b> | <b>2770 (67.0)</b> | <b>1083 (29.4)</b> |
| Grade 1                                           | 1437 (34.7)        | 698 (19.0)         | 1354 (32.7)         | 539 (14.6)        | 1683 (40.7)        | 944 (25.6)         |
| Grade 2                                           | 318 (7.7)          | 71 (1.9)           | 875 (21.2)          | 73 (2.0)          | 1031 (24.9)        | 133 (3.6)          |
| Grade 3                                           | 13 (0.3)           | 2 (<0.1)           | 43 (1.0)            | 5 (0.1)           | 55 (1.3)           | 6 (0.2)            |
| Grade 4                                           | 0                  | 0                  | 1 (<0.1)            | 0                 | 1 (<0.1)           | 0                  |
| Missing                                           | 7 (0.2)            | 8 (0.2)            | 72 (1.7)            | 12 (0.3)          | 2 (<0.1)           | 5 (0.1)            |

**Supplementary Table S11 | Overall Summary of Unsolicited Adverse Events up to Twenty-One Days after Each Vaccine (SAS)**

‘N’ is the total number of participants in the Safety Analysis Set (SAS) who received a given vaccination. ‘n’ is the number of a participants reporting at least 1 occurrence of the specified event category and is shown as a percentage in brackets. Grade 3 = Severe. Abbreviations: AE, adverse event; AESI, adverse event of special interest; CoVLP, coronavirus-like particle; MAAE, medically attended adverse event; n, number of subjects in category; pIMDs, potential immune-mediated diseases, SAE, serious adverse event; VAED, vaccine-associated enhanced disease.

| n (%)                                     | Vaccination 1            |                      | Vaccination 2            |                      | Overall                  |                     |
|-------------------------------------------|--------------------------|----------------------|--------------------------|----------------------|--------------------------|---------------------|
|                                           | CoVLP+ AS03<br>N= 12 036 | Placebo<br>N= 12 040 | CoVLP+ AS03<br>N= 11 312 | Placebo<br>N= 10 775 | CoVLP+ AS03<br>N= 12 036 | Placebo<br>N= 12040 |
| <b>Immediate Unsolicited AEs</b>          | 19 (0.2)                 | 19 (0.2)             | 4 (<0.1)                 | 7 (<0.1)             | 23 (0.2)                 | 26 (0.2)            |
| <b>Unsolicited AEs</b>                    | 1 722 (14.3)             | 1 647 (13.7)         | 1 424 (12.6)             | 1 132 (10.5)         | 2 735 (22.7)             | 2 451 (20.4)        |
| ≥ Grade 3                                 | 39 (0.3)                 | 38 (0.3)             | 30 (0.3)                 | 30 (0.3)             | 69 (0.6)                 | 65 (0.5)            |
| <b>SAEs</b>                               | 13 (0.1)                 | 9 (<0.1)             | 11 (<0.1)                | 8 (<0.1)             | 24 (0.2)                 | 16 (0.1)            |
| <b>Related SAEs</b>                       | 0                        | 0                    | 0                        | 0                    | 0                        | 0                   |
| <b>MAAEs</b>                              | 287 (2.4)                | 276 (2.3)            | 242 (2.1)                | 230 (2.1)            | 509 (4.2)                | 490 (4.1)           |
| <b>Related MAAEs</b>                      | 28 (0.2)                 | 21 (0.2)             | 20 (0.2)                 | 22 (0.2)             | 48 (0.4)                 | 43 (0.4)            |
| <b>AEs Leading to Study Withdrawal</b>    | 1 (<0.1)                 | 5 (<0.1)             | 0                        | 2 (<0.1)             | 1 (<0.1)                 | 7 (<0.1)            |
| <b>AESIs Reported by the Investigator</b> | 2 (<0.1)                 | 0                    | 2 (<0.1)                 | 0                    | 4 (<0.1)                 | 0                   |
| <b>AESIs Identified by Data analysis</b>  |                          |                      |                          |                      |                          |                     |
| Potential VAED                            | 0                        | 0                    | 0                        | 0                    | 0                        | 0                   |
| Related Potential VAED                    | 0                        | 0                    | 0                        | 0                    | 0                        | 0                   |
| Related Anaphylactic Reactions            | 0                        | 0                    | 0                        | 0                    | 0                        | 0                   |
| pIMDs                                     | 8 (<0.1)                 | 5 (<0.1)             | 7 (<0.1)                 | 3 (<0.1)             | 15 (0.1)                 | 8 (<0.1)            |
| Related pIMDs                             | 1 (<0.1)                 | 0                    | 1 (<0.1)                 | 1 (<0.1)             | 2 (<0.1)                 | 1 (<0.1)            |
| <b>AEs Leading to Death</b>               | 0                        | 2 (<0.1)             | 0                        | 2 (<0.1)             | 0                        | 4 (<0.1)            |

**Supplementary Table S12 | Overall Summary of Unsolicited Adverse Events from Day 43 to 201 (SAS)**

‘N’ is the total number of participants in the Safety Analysis Set (SAS) who received a given vaccination. ‘n’ is the number of a participants reporting at least 1 occurrence of the specified event category and is shown as a percentage in brackets. Grade 3 = Severe. Abbreviations: AE, adverse event; AESI, adverse event of special interest; CoVLP, coronavirus-like particle; MAAE, medically attended adverse event; n, number of subjects in category; pIMDs, potential immune-mediated diseases, SAE, serious adverse event; VAED, vaccine-associated enhanced disease.

| n (%)                                     | Vaccination 1 |           | Vaccination 2 |           | Overall     |           |
|-------------------------------------------|---------------|-----------|---------------|-----------|-------------|-----------|
|                                           | CoVLP+ AS03   | Placebo   | CoVLP+ AS03   | Placebo   | CoVLP+ AS03 | Placebo   |
|                                           | N= 12 036     | N= 12 040 | N= 11 312     | N= 10 775 | N= 12 036   | N= 12040  |
| <b>Unsolicited AEs</b>                    | 1 (<0.1)      | 5 (<0.1)  | 510 (4.5)     | 475 (4.4) | 511 (4.2)   | 480 (4.0) |
| ≥ Grade 3                                 | 0             | 1 (<0.1)  | 21 (0.2)      | 28 (0.3)  | 21 (0.2)    | 29 (0.2)  |
| <b>SAEs</b>                               | 0             | 2 (<0.1)  | 19 (0.2)      | 20 (0.2)  | 19 (0.2)    | 22 (0.2)  |
| <b>Related SAEs</b>                       | 0             | 0         | 0             | 1 (<0.1)  | 0           | 1 (<0.1)  |
| <b>MAAEs</b>                              | 1 (<0.1)      | 3 (<0.1)  | 199 (1.8)     | 197 (1.8) | 200 (1.7)   | 200 (1.7) |
| <b>Related MAAEs</b>                      | 0             | 0         | 2 (<0.1)      | 2 (<0.1)  | 2 (<0.1)    | 2 (<0.1)  |
| <b>AEs Leading to Study Withdrawal</b>    | 1 (<0.1)      | 0         | 3 (<0.1)      | 5 (<0.1)  | 4 (<0.1)    | 5 (<0.1)  |
| <b>AESIs Reported by the Investigator</b> | 0             | 0         | 2 (<0.1)      | 0         | 2 (<0.1)    | 0         |
| <b>AESIs Identified by Data analysis</b>  |               |           |               |           |             |           |
| Potential VAED                            | 0             | 0         | 0             | 0         | 0           | 0         |
| Related Potential VAED                    | 0             | 0         | 0             | 0         | 0           | 0         |
| Related Anaphylactic Reactions            | 0             | 0         | 0             | 0         | 0           | 0         |
| pIMDs                                     | 0             | 0         | 6 (<0.1)      | 2 (<0.1)  | 6 (<0.1)    | 2 (<0.1)  |
| Related pIMDs                             | 0             | 0         | 0             | 0         | 0           | 0         |
| <b>AEs Leading to Death</b>               | 0             | 0         | 4 (<0.1)      | 5 (<0.1)  | 4 (<0.1)    | 5 (<0.1)  |

**Supplementary Table S13 | Incidence of Specific Unsolicited Adverse Events reported up to the Safety Data cut-off date of October 25, 2021 (SAS)**

‘N’ is the total number of participants in the Safety Analysis Set (SAS) who received a given vaccination. ‘n’ is the number of a participants reporting at least 1 occurrence of the specified event preferred term (PT) category and is shown as a percentage in brackets. All event PTs reported in  $\geq 1\%$  of subjects after receiving first and or second treatment in CoVLP+AS03 treatment group are listed.

| n (%)                                                   | Vaccination 1           |                         | Vaccination 2           |                         | Overall                 |                         |
|---------------------------------------------------------|-------------------------|-------------------------|-------------------------|-------------------------|-------------------------|-------------------------|
|                                                         | CoVLP+ AS03<br>N= 12036 | Placebo<br>N= 12040     | CoVLP+ AS03<br>N= 11312 | Placebo<br>N= 10775     | CoVLP+ AS03<br>N= 12036 | Placebo<br>N= 12040     |
| <b>Subjects with <math>\geq 1</math> unsolicited AE</b> | <b>1 722<br/>(14.3)</b> | <b>1 647<br/>(13.7)</b> | <b>1 424<br/>(12.6)</b> | <b>1 132<br/>(10.5)</b> | <b>2 735<br/>(22.7)</b> | <b>2 451<br/>(20.4)</b> |
| Influenza                                               | 43 (0.4)                | 61 (0.5)                | 110 (1.0)               | 88 (0.8)                | 152 (1.3)               | 149 (1.2)               |
| Headache                                                | 268 (2.2)               | 268 (2.2)               | 165 (1.5)               | 165 (1.5)               | 410 (3.4)               | 405 (3.4)               |
| Nasal congestion                                        | 115 (1.0)               | 131 (1.1)               | 111 (1.0)               | 110 (1.0)               | 215 (1.8)               | 223 (1.9)               |
| Oropharyngeal pain                                      | 76 (0.6)                | 90 (0.7)                | 75 (0.7)                | 82 (0.8)                | 147 (1.2)               | 169 (1.4)               |
| Cough                                                   | 57 (0.5)                | 73 (0.6)                | 60 (0.5)                | 57 (0.5)                | 115 (1.0)               | 127 (1.1)               |
| Diarrhea                                                | 61 (0.5)                | 61 (0.5)                | 72 (0.6)                | 54 (0.5)                | 129 (1.1)               | 110 (0.9)               |
| Nausea                                                  | 61 (0.5)                | 45 (0.4)                | 74 (0.7)                | 42 (0.4)                | 128 (1.1)               | 85 (0.7)                |
| Myalgia                                                 | 90 (0.7)                | 67 (0.6)                | 62 (0.5)                | 43 (0.4)                | 146 (1.2)               | 109 (0.9)               |

**Supplementary Table S14 | Incidence of Adverse Events of Special Interest based on Serious Adverse Events Reported after Vaccination with Other COVID-19 Vaccines (SAS)**

‘N’ is the total number of participants in the Safety Analysis Set (SAS) who received a given vaccination. ‘n’ is the number of a participants reporting at least 1 occurrence of the specified event category and is shown as a percentage in brackets.

| n (%)                                  | Vaccination 1 |          | Vaccination 2 |          | Overall     |          |
|----------------------------------------|---------------|----------|---------------|----------|-------------|----------|
|                                        | CoVLP+ AS03   | Placebo  | CoVLP+ AS03   | Placebo  | CoVLP+ AS03 | Placebo  |
|                                        | N= 12036      | N= 12040 | N= 11312      | N= 10775 | N= 12036    | N= 12040 |
| Acute respiratory distress syndrome    | 0             | 1 (<0.1) | 0             | 0        | 0           | 1 (<0.1) |
| Arrhythmia                             | 1 (<0.1)      | 1 (<0.1) | 0             | 1 (<0.1) | 1 (<0.1)    | 2 (<0.1) |
| Myocarditis                            | 0             | 0        | 1 (<0.1)      | 1 (<0.1) | 1 (<0.1)    | 1 (<0.1) |
| Pericarditis                           | 0             | 0        | 0             | 0        | 0           | 0        |
| Bell’s palsy                           | 1 (<0.1)      | 0        | 1 (<0.1)      | 0        | 2 (<0.1)    | 0        |
| Facial Paralysis                       | 0             | 0        | 1 (<0.1)      | 1 (<0.1) | 1 (<0.1)    | 1 (<0.1) |
| Deep vein thrombosis                   | 0             | 0        | 1 (<0.1)      | 0        | 1 (<0.1)    | 0        |
| Embolism                               | 0             | 0        | 0             | 0        | 0           | 0        |
| Cerebral venous sinus thrombosis       | 0             | 0        | 0             | 0        | 0           | 0        |
| Thrombocytopenia                       | 0             | 0        | 0             | 0        | 0           | 0        |
| Disseminated intravascular coagulation | 0             | 0        | 0             | 0        | 0           | 0        |
| Guillain-Barré syndrome                | 0             | 0        | 0             | 0        | 0           | 0        |

## *References*

1. Rothman KJ, Greenland S, TL L. Chapter 14. Modern Epidemiology 3rd ed. Philadelphia: Lippincott Williams & Wilkins; 2008.
2. Lu X, Wang L, Sakthivel SK, et al. US CDC Real-Time Reverse Transcription PCR Panel for Detection of Severe Acute Respiratory Syndrome Coronavirus 2. CDC- Emerging Infectious Diseases 2000;26.
3. COVID Data Tracker. (Accessed February 23, 2022, at <https://covid.cdc.gov/covid-data-tracker/>.)
4. Jin JM, Bai P, He W, et al. Gender Differences in Patients With COVID-19: Focus on Severity and Mortality. Front Public Health 2020;8:152.
5. Qian J, Zhao L, Ye RZ, Li XJ, Liu YL. Age-dependent Gender Differences in COVID-19 in Mainland China: Comparative Study. Clin Infect Dis 2020;71:2488-94.
6. Wehbe Z, Hammoud SH, Yassine HM, Fardoun M, El-Yazbi AF, Eid AH. Molecular and Biological Mechanisms Underlying Gender Differences in COVID-19 Severity and Mortality. Frontiers in immunology 2021;12:659339.
7. Risk Factors for Coronavirus Disease 2019 (COVID-19) Death in a Population Cohort Study from the Western Cape Province, South Africa. Clin Infect Dis 2021;73:e2005-e15.
8. Zádori N, Vánca S, Farkas N, Hegyi P, Eröss B. The negative impact of comorbidities on the disease course of COVID-19. Intensive Care Med 2020;46:1784-6.
9. Macias Gil R, Marcelin JR, Zuniga-Blanco B, Marquez C, Mathew T, Piggott DA. COVID-19 Pandemic: Disparate Health Impact on the Hispanic/Latinx Population in the United States. J Infect Dis 2020;222:1592-5.
10. Warren RC, Forrow L, Hodge DA, Sr., Truog RD. Trustworthiness before Trust - Covid-19 Vaccine Trials and the Black Community. N Engl J Med 2020;383:e121.
