# Supplementary material
Source: PubMed Central journal article supplement (PMC9127773)
Supplement: NEJMoa2201300_data-sharing.pdf [file NEJMoa2201300_data-sharing.pdf]

## Data Sharing Statement

Hager KJ, Pérez Marc G, Gobeil P, et al. Efficacy and Safety of a Recombinant Plant-Based Adjuvanted Covid-19 Vaccine. N Engl J Med. DOI: 10.1056/NEJMoa2201300.

| Question                                                            | Authors' Response                                                                                                                                                                                                                                                                                                                                 |
|---------------------------------------------------------------------|---------------------------------------------------------------------------------------------------------------------------------------------------------------------------------------------------------------------------------------------------------------------------------------------------------------------------------------------------|
| Will the data collected for your study be made available to others? | Yes                                                                                                                                                                                                                                                                                                                                               |
| Would you like to offer context for your decision?                  | —                                                                                                                                                                                                                                                                                                                                                 |
| Which data?                                                         | Other (e.g., partial data sets)                                                                                                                                                                                                                                                                                                                   |
| Additional information about data                                   | Clinical data that support the findings of this study are available with permission of Medicago from the corresponding author (Brian J. Ward) or through communications@medicago.com upon reasonable request. To protect the privacy of patients and individuals involved in our studies, Medicago does not publicly disclose patient-level data. |
| How or where can the data be obtained?                              | Available with permission of Medicago from the corresponding author (wardb@medicago.com) or through communications@medicago.com.                                                                                                                                                                                                                  |
| When will data availability begin?                                  | With publication                                                                                                                                                                                                                                                                                                                                  |
| When will data availability end?                                    | —                                                                                                                                                                                                                                                                                                                                                 |
| Will any supporting documents be available?                         | —                                                                                                                                                                                                                                                                                                                                                 |
| Which supporting documents?                                         | —                                                                                                                                                                                                                                                                                                                                                 |
| Additional information about supporting documents                   | —                                                                                                                                                                                                                                                                                                                                                 |
| How or where can supporting documents be obtained?                  | —                                                                                                                                                                                                                                                                                                                                                 |
| When will supporting documents availability begin?                  | —                                                                                                                                                                                                                                                                                                                                                 |
| When will supporting documents availability end?                    | —                                                                                                                                                                                                                                                                                                                                                 |
| To whom will data be available?                                     | —                                                                                                                                                                                                                                                                                                                                                 |
| For what type of analysis or purpose?                               | —                                                                                                                                                                                                                                                                                                                                                 |
| By what mechanism?                                                  | —                                                                                                                                                                                                                                                                                                                                                 |
| Any other restrictions?                                             | —                                                                                                                                                                                                                                                                                                                                                 |
| Additional information                                              | —                                                                                                                                                                                                                                                                                                                                                 |

This statement was posted on May 4, 2022, at [NEJM.org](https://www.nejm.org).
